# Supplementary material for: Alterations to the middle cerebral artery of the hypertensive-arthritic rat model potentiates intracerebral hemorrhage
Source: PeerJ. 2016 Nov 3;4:e2608. doi: 10.7717/peerj.2608 (PMC5101607; doi:10.7717/peerj.2608)
Supplement: Supplemental Information 1 [file peerj-04-2608-s001.xlsx]

## Sheet: PDC
	SHR HS CFA					SHR HS SAL					SHR RD CFA					SHR RD SAL					SHR HS SAL IL17					SHR HS CFA IL17					SHR RD SAL IL17					SHR RD CFA IL17
	AVG	SD	n	SEM		AVG	SD	n	SEM		AVG	SD	n	SEM		AVG	SD	n	SEM		AVG	SD	n	SEM		AVG	SD	n	SEM		AVG	SD	n	SEM		AVG	SD	n	SEM
%PDC	-12.7028	12.8058	12	3.7		-12.8	8.36523	8	3		-9.35096	8.0302	10	2.5		-23.4938	15.1351	11	4.6		-7.52	11.1102	5	5		-4.75253	6.07744	9	2		-4.83688	3.40693	4	1.7		-1.075	2.15	4	1.1
	HS CFA	HS SAL				RD CFA	RD SAL				HS CFA	HS CFA IL-17	HS SAL	HS SAL IL-17				RD CFA	RD CFA IL17	RD SAL	RD SAL IL17
	12.7028	12.8				9.35096	23.4938				12.7028	4.75253	12.8	7.52				9.35096	1.075	23.4938	4.83688
		HS SAL	HS CFA	RD SAL	RD CFA
		12.8	12.7028	23.4938	9.35096

## Sheet: Bradykinin
	SHR HS CFA					SHR HS SAL					SHR RD CFA					SHR RD SAL					SHR HS SAL IL17					SHR HS CFA IL17					SHR RD SAL IL17					SHR RD CFA IL17
	AVG	SD	n	SEM		AVG	SD	n	SEM		AVG	SD	n	SEM		AVG	SD	n	SEM		AVG	SD	n	SEM		AVG	SD	n	SEM		AVG	SD	n	SEM		AVG	SD	n	SEM
%Bradykinin	7.45454	10.253	5	4.6		75.7333	24.785	6	10.1		80.0697	28.6362	8	10.1		88.4476	19.0916	11	5.8		43.675	13.8013	4	6.9		27.8	39.3151	2	27.8		25.1809	35.8548	4	18		0		1
	HS CFA	HS SAL				RD CFA	RD SAL				HS CFA	HS CFA IL-17	HS SAL	HS SAL IL-17				RD CFA	RD CFA IL17	RD SAL	RD SAL IL17
	7.45454	75.7333				80.0697	88.4476				7.45454	27.8	75.7333	43.675				80.0697	0	88.4476	25.1809
		HS SAL	HS CFA	RD SAL	RD CFA
		75.7333	7.45454	88.4476	80.0697

## Sheet: L-NAME
	SHR HS CFA					SHR HS SAL					SHR RD CFA					SHR RD SAL					SHR HS SAL IL17					SHR HS CFA IL17					SHR RD SAL IL17					SHR RD CFA IL17
	AVG	SD	n	SEM		AVG	SD	n	SEM		AVG	SD	n	SEM		AVG	SD	n	SEM		AVG	SD	n	SEM		AVG	SD	n	SEM		AVG	SD	n	SEM		AVG	SD	n	SEM
%L-NAME	8.70615	9.37981	12	2.7		25.2875	16.0059	8	5.7		12.13	8.69407	9	2.9		18.3266	12.025	11	3.6		1.78	3.44848	5	1.5		7.1	7.43909	9	2.5		8.86288	14.1931	4	7.1		5.775	9.02603	4	4.5
	HS CFA	HS SAL				RD CFA	RD SAL				HS CFA	HS CFA IL-17	HS SAL	HS SAL IL-17				RD CFA	RD CFA IL17	RD SAL	RD SAL IL17
	8.70615	25.2875				12.13	18.3266				8.70615	7.1	25.2875	1.78				12.13	5.775	18.3266	8.86288
HS SAL	HS CFA	RD SAL	RD CFA
25.2875	8.70615	18.3266	12.13

## Sheet: Vasopressin
	SHR HS CFA					SHR HS SAL					SHR RD CFA					SHR RD SAL					SHR HS SAL IL17					SHR HS CFA IL17					SHR RD SAL IL17					SHR RD CFA IL17
	AVG	SD	n	SEM		AVG	SD	n	SEM		AVG	SD	n	SEM		AVG	SD	n	SEM		AVG	SD	n	SEM		AVG	SD	n	SEM		AVG	SD	n	SEM		AVG	SD	n	SEM
%Vasopressin	11.873	5.94962	12	1.7		23.15	18.7681	8	6.6		16.8495	9.21021	10	2.9		14.2778	13.9929	9	4.7		13.26	6.95147	5	3.1		12.2384	8.3272	9	2.8		9.55598	5.45023	4	2.8		10.55	7.93914	4	4
	HS CFA	HS SAL				RD CFA	RD SAL				HS CFA	HS CFA IL-17	HS SAL	HS SAL IL-17				RD CFA	RD CFA IL17	RD SAL	RD SAL IL17
	11.873	23.15				16.8495	14.2778				11.873	12.2384	23.15	13.26				16.8495	10.55	14.2778	9.55598
	HS SAL	HS CFA	RD SAL	RD CFA
	23.15	11.873	14.2778	16.8495

## Sheet: Phorbol
	SHR HS CFA					SHR HS SAL					SHR RD CFA					SHR RD SAL					SHR HS SAL IL17					SHR HS CFA IL17					SHR RD SAL IL17					SHR RD CFA IL17
	AVG	SD	n	SEM		AVG	SD	n	SEM		AVG	SD	n	SEM		AVG	SD	n	SEM		AVG	SD	n	SEM		AVG	SD	n	SEM		AVG	SD	n	SEM		AVG	SD	n	SEM
%Phorbol Dibutyrate	28.9922	19.0448	12	5.5		50.675	13.7548	8	4.9		33.2727	23.213	10	7.3		52.9474	21.622	11	6.5		47.68	8.12139	5	3.6		31.211	17.8909	9	6		37.1422	23.3441	4	11.7		30.275	21.0837	4	10.6
	HS CFA	HS SAL				RD CFA	RD SAL				HS CFA	HS CFA IL-17	HS SAL	HS SAL IL-17				RD CFA	RD CFA IL17	RD SAL	RD SAL IL17
	28.9922	50.675				33.2727	52.9474				28.9922	31.211	50.675	47.68				33.2727	30.275	52.9474	37.1422
		HS SAL	HS CFA	RD SAL	RD CFA
		50.675	28.9922	52.9474	33.2727

## Sheet: All Vessel Data
	SHR HS CFA					SHR HS SAL					SHR RD CFA					SHR RD SAL					SHR HS SAL IL17					SHR HS CFA IL17					SHR RD SAL IL17					SHR RD CFA IL17
	AVG	SD	n	SEM		AVG	SD	n	SEM		AVG	SD	n	SEM		AVG	SD	n	SEM		AVG	SD	n	SEM		AVG	SD	n	SEM		AVG	SD	n	SEM		AVG	SD	n	SEM
%PDC	-12.7028	12.8058	12	3.7		-12.8	8.36523	8	3		-9.35096	8.0302	10	2.5		-23.4938	15.1351	11	4.6		-7.52	11.1102	5	5		-4.75253	6.07744	9	2		-4.83688	3.40693	4	1.7		-1.075	2.15	4	1.1
%Bradykinin	7.45454	10.253	5	4.6		75.7333	24.785	6	10.1		80.0697	28.6362	8	10.1		88.4476	19.0916	11	5.8		43.675	13.8013	4	6.9		27.8	39.3151	2	27.8		25.1809	35.8548	4	18		0		1
%L-NAME	-8.70615	9.37981	12	2.7		-25.2875	16.0059	8	5.7		-12.13	8.69407	9	2.9		-18.3266	12.025	11	3.6		-1.78	3.44848	5	1.5		-7.1	7.43909	9	2.5		-8.86287	14.1931	4	7.1		-5.775	9.02603	4	4.5
%Vasopressin	-11.873	5.94962	12	1.7		-23.15	18.7681	8	6.6		-16.8495	9.21021	10	2.9		-14.2778	13.9929	9	4.7		-13.26	6.95147	5	3.1		-12.2384	8.3272	9	2.8		-9.55598	5.45023	4	2.8		-10.55	7.93914	4	4
%Phorbol Dibutyrate	-28.9922	19.0448	12	5.5		-50.675	13.7548	8	4.9		-33.2727	23.213	10	7.3		-52.9474	21.622	11	6.5		-47.68	8.12139	5	3.6		-31.211	17.8909	9	6		-37.1422	23.3441	4	11.7		-30.275	21.0837	4	10.6
REVISED DATA!!! - MARCH 10, 2015
	SHR HS CFA					SHR HS SAL					SHR RD CFA					SHR RD SAL					SHR HS SAL IL17					SHR HS CFA IL17					SHR RD SAL IL17					SHR RD CFA IL17
	AVG	SD	n	SEM		AVG	SD	n	SEM		AVG	SD	n	SEM		AVG	SD	n	SEM		AVG	SD	n	SEM		AVG	SD	n	SEM		AVG	SD	n	SEM		AVG	SD	n	SEM
%PDC	-13.481	12.7748	14	3.42		-11.63	7.78318	10	2.47		-9.35096	8.0302	10	2.5		-23.4938	15.1351	11	4.6		-8.72857	9.30443	7			-6.53389	6.78353	11			-4.83688	3.40693	4	1.7		-1.075	2.15	4	1.1
%Bradykinin	31.1961	41.7596	7	15.8		70.55	33.3087	8	11.78		80.0697	28.6362	8	10.1		88.4476	19.0916	11	5.8		58.9167	26.7726	6			57.3	42.3287	4			25.1809	35.8548	4	18		0		1
%L-NAME	-12.4124	13.503	14	3.61		-28.28	16.1302	10	5.09		-12.13	8.69407	9	2.9		-18.3266	12.025	11	3.6		-6.21429	10.2412	7			-7.60909	6.76143	11			-8.86287	14.1931	4	7.1		-5.775	9.02603	4	4.5
%Vasopressin	-12.1197	6.17259	14	1.66		-22.07	17.0444	10	5.38		-16.8495	9.21021	10	2.9		-14.2778	13.9929	9	4.7		-12.8429	5.76942	7			-11.5496	7.79659	11			-9.55598	5.45023	4	2.8		-10.55	7.93914	4	4
%Phorbol Dibutyrate	-30.7433	18.1793	14	4.86		-50.16	14.2515	10	4.52		-33.2727	23.213	10	7.3		-52.9474	21.622	11	6.5		-49.6714	7.51304	7			-34.1181	19.1791	11			-37.1422	23.3441	4	11.7		-30.275	21.0837	4	10.6
REVISED DATA!!! - MARCH 10, 2015
		%PDC				%Bradykinin					%L-NAME					%Vasopressin					%Phorbol Dibutyrate
	AVG	SD	n	SEM		AVG	SD	n	SEM		AVG	SD	n	SEM		AVG	SD	n	SEM		AVG	SD	n	SEM		AVG	SD	n	SEM		AVG	SD	n	SEM		AVG	SD	n	SEM
SHR HS CFA	-13.481	12.7748	14	3.42		31.1961	41.7596	7	15.8		-12.4124	13.503	14	3.61		-12.1197	6.17259	14	1.66		-30.7433	18.1793	14	4.86
SHR HS SAL	-11.63	7.78318	10	2.47		70.55	33.3087	8	11.78		-28.28	16.1302	10	5.09		-22.07	17.0444	10	5.38		-50.16	14.2515	10	4.52
SHR RD CFA	-9.35096	8.0302	10	2.5		80.0697	28.6362	8	10.1		-12.13	8.69407	9	2.9		-16.8495	9.21021	10	2.9		-33.2727	23.213	10	7.3
SHR RD SAL	-23.4938	15.1351	11	4.6		88.4476	19.0916	11	5.8		-18.3266	12.025	11	3.6		-14.2778	13.9929	9	4.7		-52.9474	21.622	11	6.5
SHR HS SAL IL17	-8.72857	9.30443	7			58.9167	26.7726	6			-6.21429	10.2412	7			-12.8429	5.76942	7			-49.6714	7.51304	7
SHR HS CFA IL17	-6.53389	6.78353	11			57.3	42.3287	4			-7.60909	6.76143	11			-11.5496	7.79659	11			-34.1181	19.1791	11
SHR RD SAL IL17	-4.83688	3.40693	4	1.7		25.1809	35.8548	4	18		-8.86288	14.1931	4	7.1		-9.55598	5.45023	4	2.8		-37.1422	23.3441	4	11.7
SHR RD CFA IL17	-1.075	2.15	4	1.1		0		1			-5.775	9.02603	4	4.5		-10.55	7.93914	4	4		-30.275	21.0837	4	10.6

## Sheet: BP
RD SAL	ASa	BSa	CSa	DSa	ESa	FSa	GSa	HSa	ISa	JSa	KSa					SD	Avg	SEM (n=10)
Day -1	216.64	235.83	246.21	277.13	218.16	236.07	241.33	234.75	218.97	208.58	197.22					15.7917	225.376	4.99
Day 6	193.73	125.45	172.05	261.32	184.16	206.26	202.96	210.41	185.61	209.19	200.88					25.5671	189.07	8.09
Day 13	162.1	164.59	162.76	260.51	187.52	188.54	175.47	163.61	191.92	177.05	176.69					11.489	175.025	3.63
Day 20	184.38	231.43	180.51	231.8	182.92	208.21	199.41	179.5	176.93	164.23	188.33					19.0164	189.585	6.01
RD CFA	A	B	C	D	E	F	G	H	I	J	K	L		SD	AVG	SEM (n=6-10)
Day -1	239.98	249.15	207.72	229.1	199.78	131.35	203.44	206.75	206.86	240.35	225.93	233.87		33.4256	211.448	10.57
Day 6	203.38	226.18	221.78	222.39	202.47	187.56					232.41	206.99		15.2039	210.627	6.21	*n=6
Day 13			215.05	236.68	209.68	137.95	156.16	158.85	151.27	158.85	220.76	238.15		36.5446	178.061	12.92	*n=8
Day 20	232.67	290.32	209.31	211.63	206.75	166.06	253.67	264.29	236.19	247.92	223.24	204.43		35.1191	231.881	11.11
HS SAL	S1	S2	S3	S4	S5	S6	S7	S8	S9	S10		SD	AVG	SEM (n=8-10)
Day -1	232.65	214.2	273.7	261.97	251.47	256.35	220.06	274.68	204.67	228.86		25.1106	241.861	7.94
Day 6	210.17	250.61	224.83	195.18	190.13	193.92	238.03	259.69	183.16	218.23		26.6168	216.395	8.42
Day 13			264.25	257.94	196.97	216.64	220.68	225.07	169.35	225.93		30.5439	222.104	10.8	*n=8
Day 20	213.47	249.39	217.17	207.6	176.08	188.54	168.99	188.05				26.1056	201.161	9.23	*n=8
HS CFA	HSA	HSB	HSC	HSD	HSE	HSF	HSG	HSH	HSI	HSJ	HSK	HSL	HSM	HSN		SD	AVG	SEM (n=11-14)
Day -1	211.63	270	257.7	235.22	250.41	225.75	182.8	192.7	187.93	209.19	282.87	227.4	196.36	203.69		31.7223	223.832	8.48
Day 6				235.46	209.03	187.32	200.27	180.35	184.88	208.21	249.39	195.5	167.4	161.9		26.6805	198.155	8.04	*n=11
Day 13	251.71	298.76	293.87		197.83	174.85	196.97	252.57			256.72	177.05	168.62	146		53.0031	219.541	15.98	*n=11
Day 20	230.08	289.96	230	207.11	169.11	207.97	190.13	239.49	195.14	213.22	266.13	198.11				33.7623	219.704	9.75	*n=12
	HS CFA	HS SAL	SEM(CFA)	SEM(SAL)					RD CFA	RD SAL	SEM(CFA)	SEM(SAL)
0	223.832	241.861	8.48	7.94				0	211.448	225.376	10.57	4.99
7	198.155	216.395	8.04	8.42				7	210.627	189.07	6.21	8.09
14	219.541	222.104	15.98	10.8				14	178.061	175.025	12.92	3.63
21	219.704	201.161	9.75	9.23				21	231.881	189.585	11.11	6.01
